# Supplementary material
Source: PubMed Central journal article supplement (PMC2709855)
Supplement: NIHMS116387-supplement-PDF.pdf [file NIHMS116387-supplement-PDF.pdf]

## Supporting Information (Total 1 Page)

### Doped Carbon Nanoparticles as New Platform for Highly Photoluminescent Dots

Ya-Ping Sun,\* Xin Wang, Fushen Lu, Li Cao, Mohammed J. Meziani, Pengju G. Luo, Lingrong Gu, L. Monica Veca

*Department of Chemistry and Laboratory for Emerging Materials and Technology, Clemson University, Clemson, South Carolina 29634-0973*

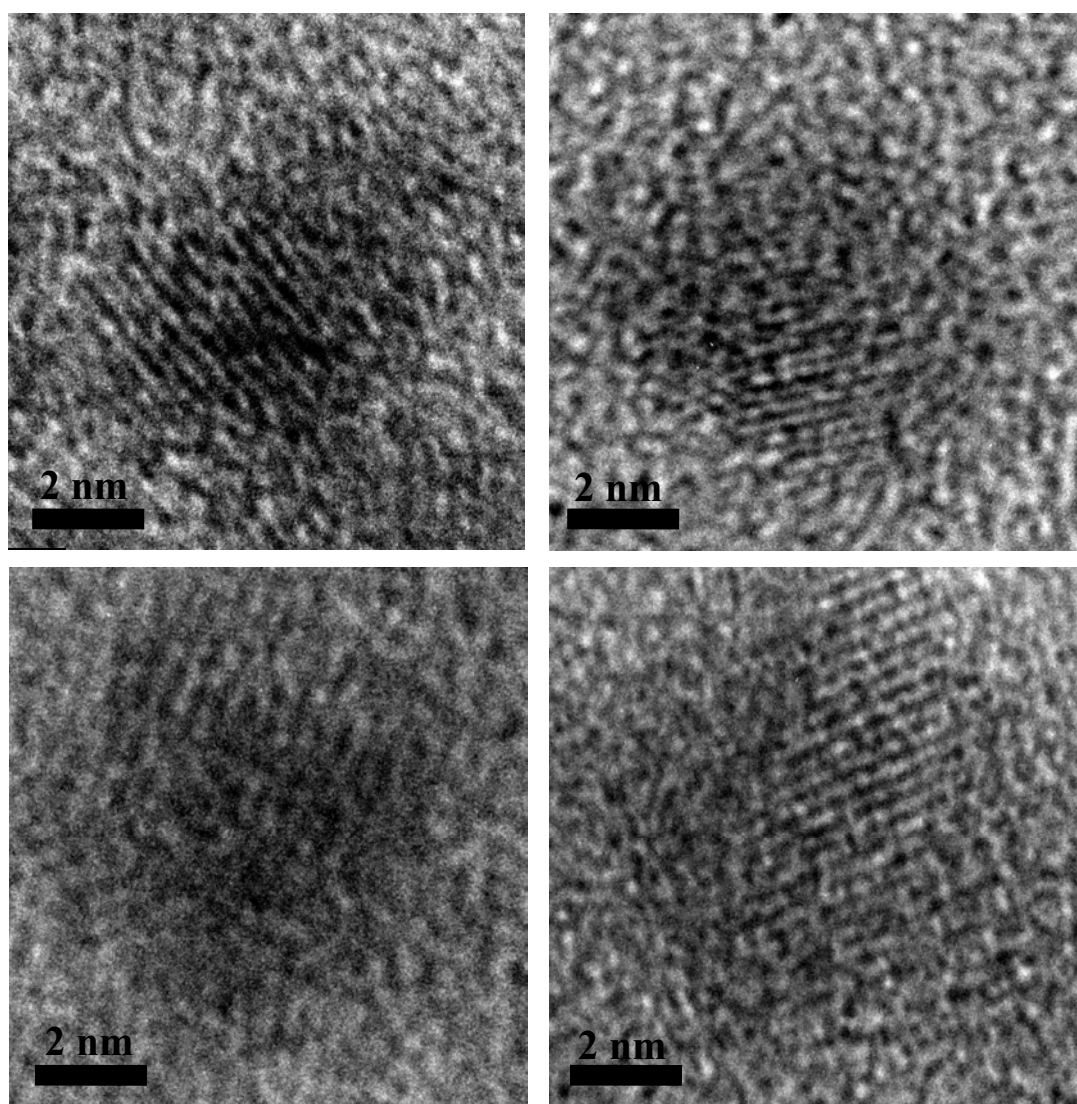

**Figure S1.** High-resolution TEM images of individual carbon dots with ZnO (top) and ZnS (bottom).
